# Supplementary material for: BLMP-1 promotes developmental cell death in C. elegans by timely repression of ced-9 transcription
Source: Oxford University Press journal article supplement (doi:10.1242/dev.193995), 2021-09-20
Supplement: dev193995supp.pdf [file dev193995supp.pdf]

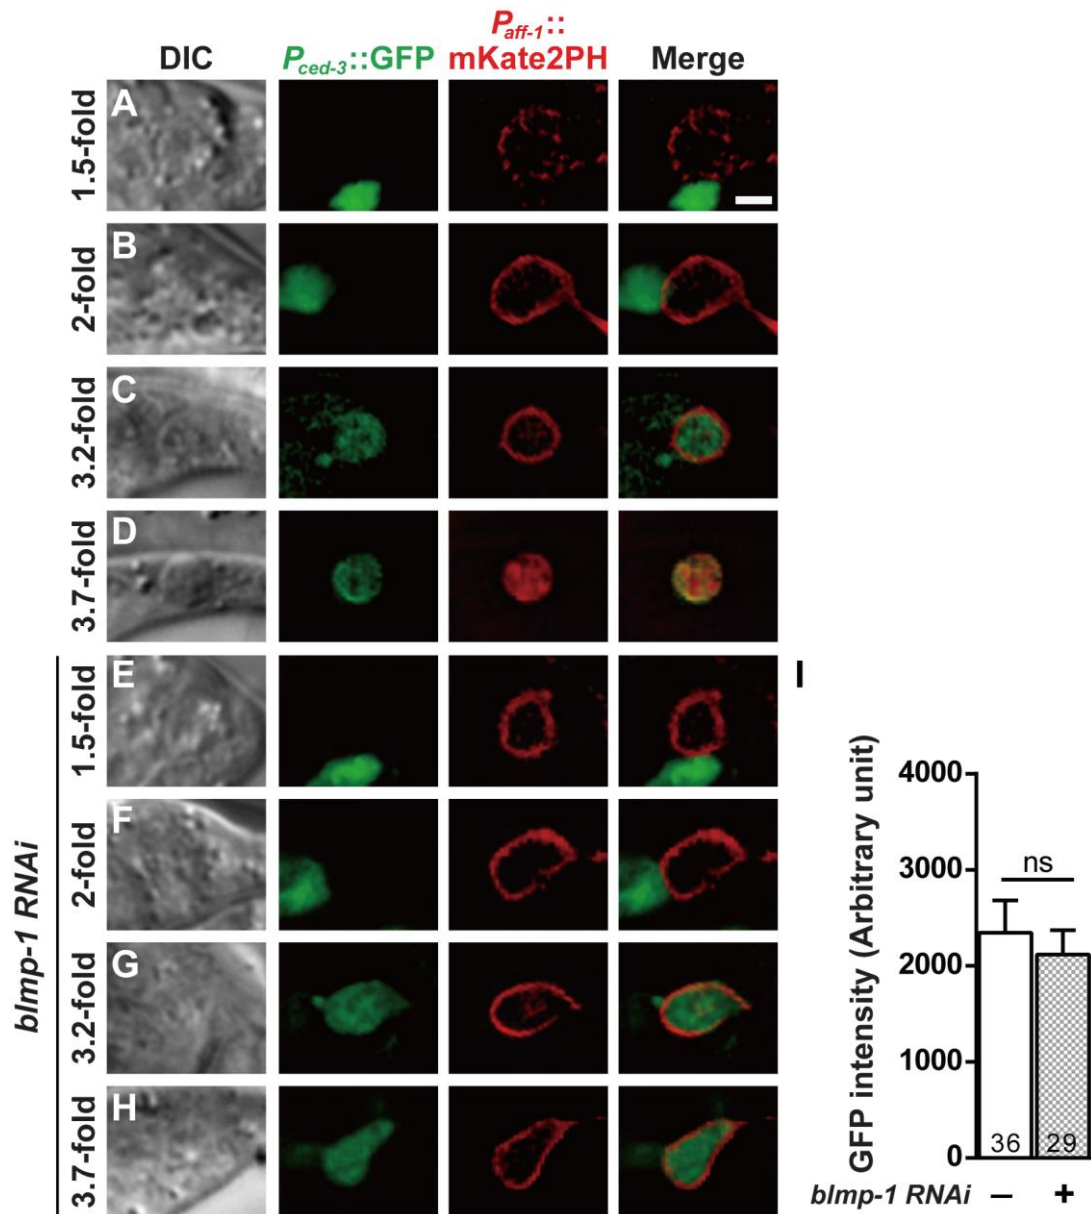

**Fig. S1.** The transcription of *ced-3* in the tail-spike cell is initiated at the 3.2-fold stage, shortly before the cell dies. (A-H) Representative DIC, GFP, mKate, and merged images of embryos expressing *tpIs16[P<sub>ced-3</sub>::gfp]* at the indicated stage. The  $P_{aff-1}::mKatePH$  was used to mark the tail-spike cell. Scale bar, 2  $\mu$ m. (I) The expression level of  $P_{ced-3}::gfp$  in the tail-spike cell at the 3.2-fold stage was measured as described in Materials and Methods. Data shown are mean  $\pm$  s.e.m. The number of embryos analyzed is shown in the bar. ns indicates no statistical difference ( $P > 0.05$ ) in a two-tailed unpaired *t*-test.

**TableS1. Transgenes**

| Transgene       | Injected plasmids and concentrations                                                                                                        | Figures                |
|-----------------|---------------------------------------------------------------------------------------------------------------------------------------------|------------------------|
| <i>nsIs435</i>  | <i>nsIs435[P<sub>aff-1</sub>::myrGFP; coelomocyte::RFP]</i>                                                                                 | Figure 1, 3, and 6     |
| <i>nsEx6304</i> | 10 ng/μL <i>blmp-1</i> fosmid + 5 ng/μL <i>P<sub>cdh-3</sub>::mCherry</i> + 0.5 ng/μL <i>P<sub>myo-2</sub>::gfp</i>                         | Figure 1               |
| <i>nsEx6305</i> | 5 ng/μL <i>P<sub>aff-1</sub>::blmp-1</i> cDNA + 5 ng/μL <i>P<sub>cdh-3</sub>::mCherry</i> + 0.5 ng/μL <i>P<sub>myo-2</sub>::gfp</i>         | Figure 1               |
| <i>tpIs6</i>    | <i>tpIs6[P<sub>cbr-ced-3(0.8kb)</sub>::gfp; P<sub>myo-2</sub>::gfp]</i>                                                                     | Figure 3, and Table 1  |
| <i>nsIs685</i>  | <i>nsIs685[P<sub>aff-1</sub>::mKate2PH; coelomocyte::RFP]</i>                                                                               | Figure 2, 4, 6, and S1 |
| <i>tpIs9</i>    | <i>tpIs9[P<sub>blmp-1</sub>::gfp]</i>                                                                                                       | Figure 2               |
| <i>cshIs41</i>  | <i>cshIs41[BLMP-1::GFP]</i>                                                                                                                 | Figure 2               |
| <i>tpEx798</i>  | 50 ng/μL <i>P<sub>ced-9</sub>::ced-9::gfp</i> + 50 ng/μL <i>P<sub>cbr-ced-3(0.8kb)</sub>::mrfp</i> + 50 ng/μL <i>P<sub>tx-3</sub>::gfp</i>  | Figure 3               |
| <i>tpEx799</i>  |                                                                                                                                             |                        |
| <i>tpEx800</i>  |                                                                                                                                             |                        |
| <i>tpEx807</i>  | 50 ng/μL <i>P<sub>ced-9Δ</sub>::ced-9::gfp</i> + 50 ng/μL <i>P<sub>cbr-ced-3(0.8kb)</sub>::mrfp</i> + 50 ng/μL <i>P<sub>tx-3</sub>::gfp</i> | Figure 3               |
| <i>tpEx808</i>  |                                                                                                                                             |                        |
| <i>tpEx809</i>  |                                                                                                                                             |                        |
| <i>tpEx976</i>  | 50 ng/μL <i>P<sub>ced-9m</sub>::ced-9::gfp</i> + 50 ng/μL <i>P<sub>cbr-ced-3(0.8kb)</sub>::mrfp</i> + 50 ng/μL <i>P<sub>tx-3</sub>::gfp</i> | Figure 3               |
| <i>tpEx977</i>  |                                                                                                                                             |                        |
| <i>tpEx978</i>  |                                                                                                                                             |                        |
| <i>tpIs13</i>   | <i>tpIs13[P<sub>ced-9</sub>::gfp]</i>                                                                                                       | Figure 4               |
| <i>tpIs15</i>   | <i>tpIs15[P<sub>ced-9m</sub>::gfp]</i>                                                                                                      | Figure 4               |
| <i>tpIs11</i>   | <i>tpIs11[P<sub>dre-1</sub>::gfp]</i>                                                                                                       | Figure 6               |
| <i>tpIs16</i>   | <i>tpIs16[P<sub>ced-3</sub>::gfp]</i>                                                                                                       | Figure S1              |
